# Supplementary material for: Chlorine-mediated atomic layer deposition of HfO2 on graphene
Source: Royal Society of Chemistry journal article supplement (doi:10.1039/d1tc03502a), 2021-01-01
Supplement: d1tc03502a1.pdf [file d1tc03502a1.pdf]

## Supplementary Information for Chlorine-Mediated Atomic Layer Deposition of HfO<sub>2</sub> on Graphene

Peter M. Wilson,<sup>1</sup> Matt L. Chin,<sup>1</sup> Chinedu E. Ekuma,<sup>2,3</sup> Sina Najmaei,<sup>1</sup> Katherine M. Price,<sup>1</sup> Theanne Schiros,<sup>5,6</sup> Madan Dubey,<sup>1</sup> James Hone<sup>4</sup>

<sup>1</sup> Sensors and Electron Devices Directorate, United States Army Research Laboratory, Adelphi, MD, USA

<sup>2</sup> Department of Physics, Lehigh University, Bethlehem, PA, 18015 USA

<sup>3</sup> Institute for Functional Materials and Devices, Lehigh University, Bethlehem, PA, 18015 USA

<sup>4</sup> Department of Mechanical Engineering, Columbia University, New York, New York 10027, United States

<sup>5</sup> Materials Science and Engineering Center, Columbia University, New York, NY 10023

<sup>6</sup> Department of Science and Mathematics, Fashion Institute of Technology, New York, NY 10001

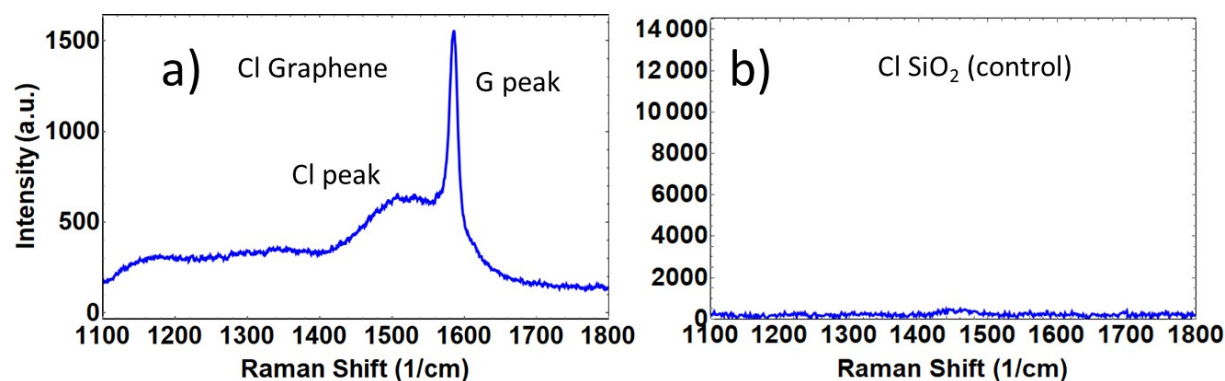

Figure S1: Raman spectra of chlorinated bare SiO<sub>2</sub> (a) and chlorinated graphene (b)

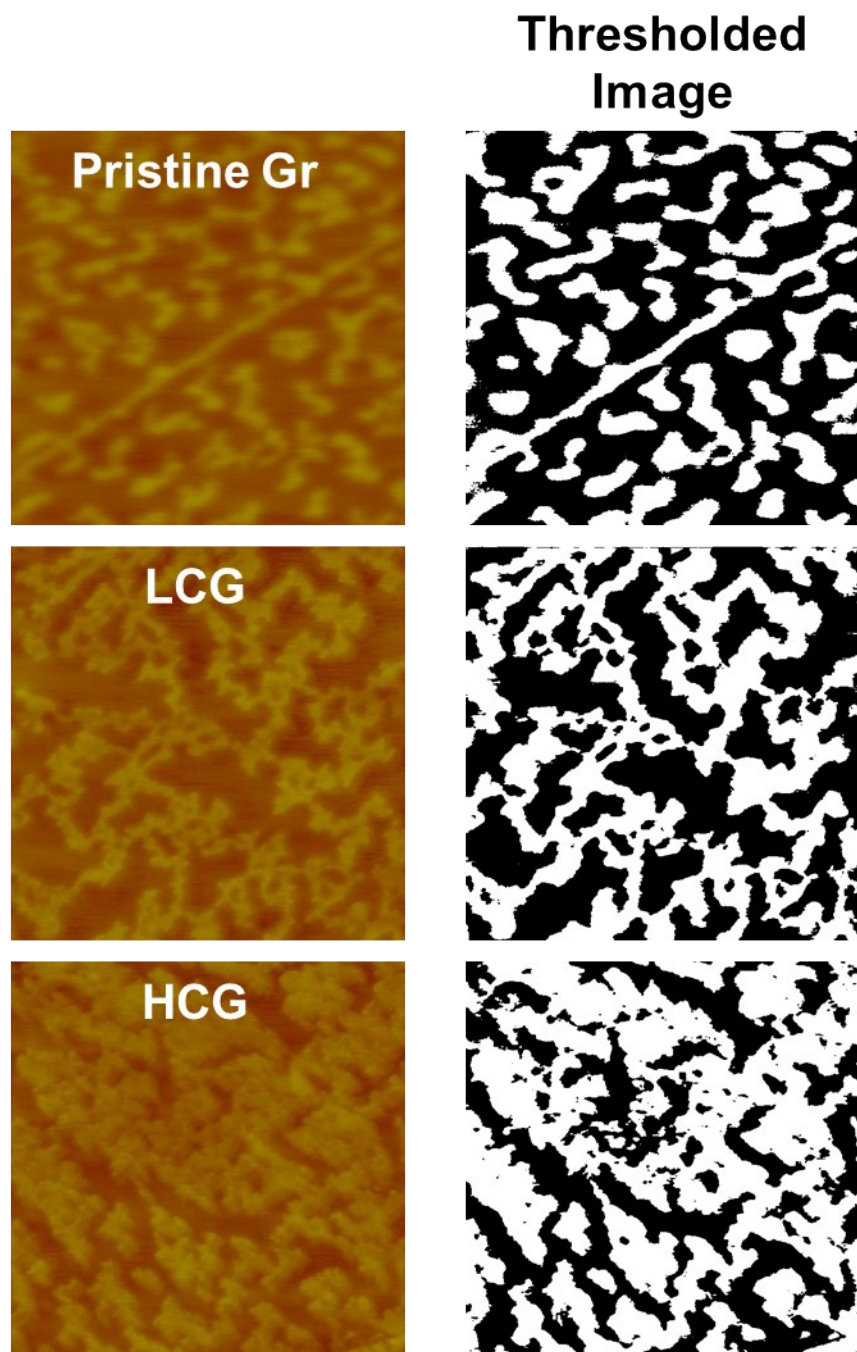

*Figure S2: Schematic demonstrating the image thresholding algorithm to calculate coverage of ALD hafnia on graphene*

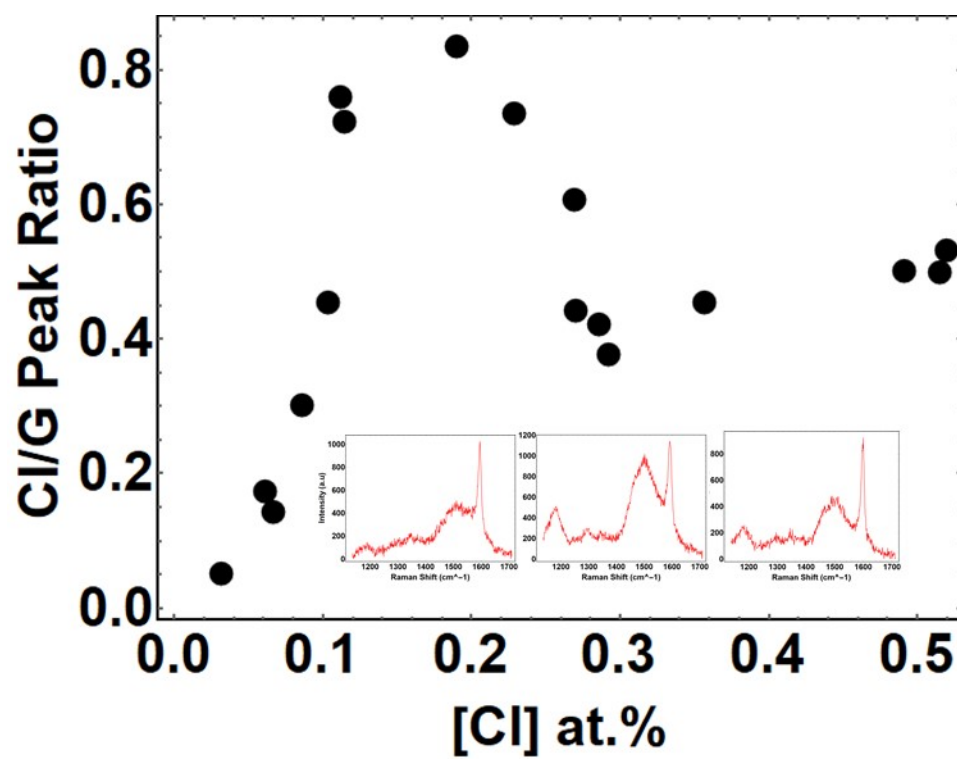

Figure S3: Correlation of the normalized Cl peak intensity (normalized to G peak) and the Cl:C ratio obtained from XPS.

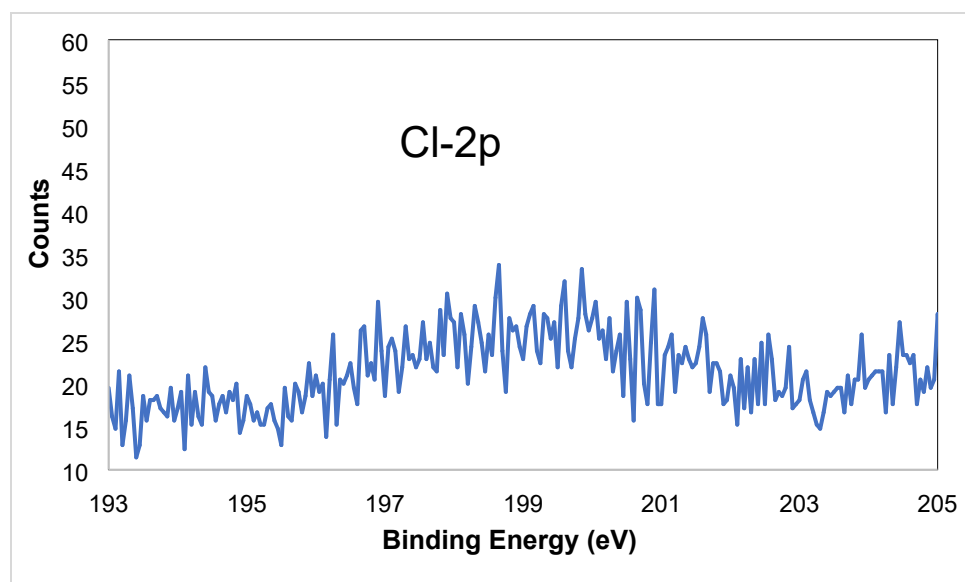

Figure S4: XPS spectrum of Cl-2p region after ALD of 2 nm of Hafnia.

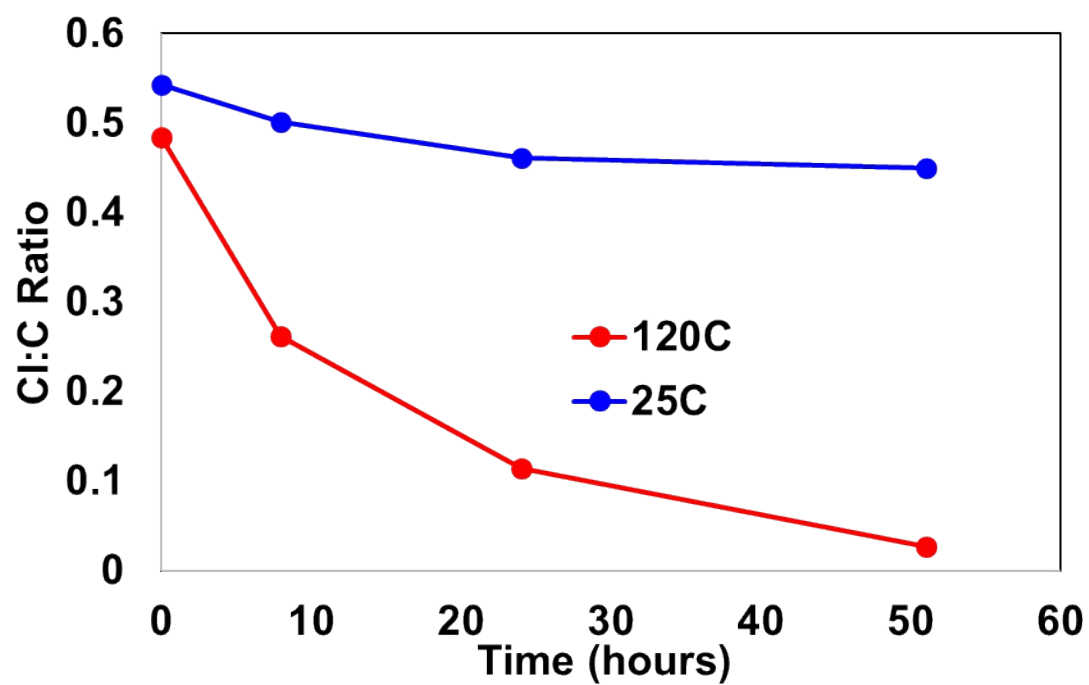

Figure S5: Evolution of Chlorine content over time at different temperatures.

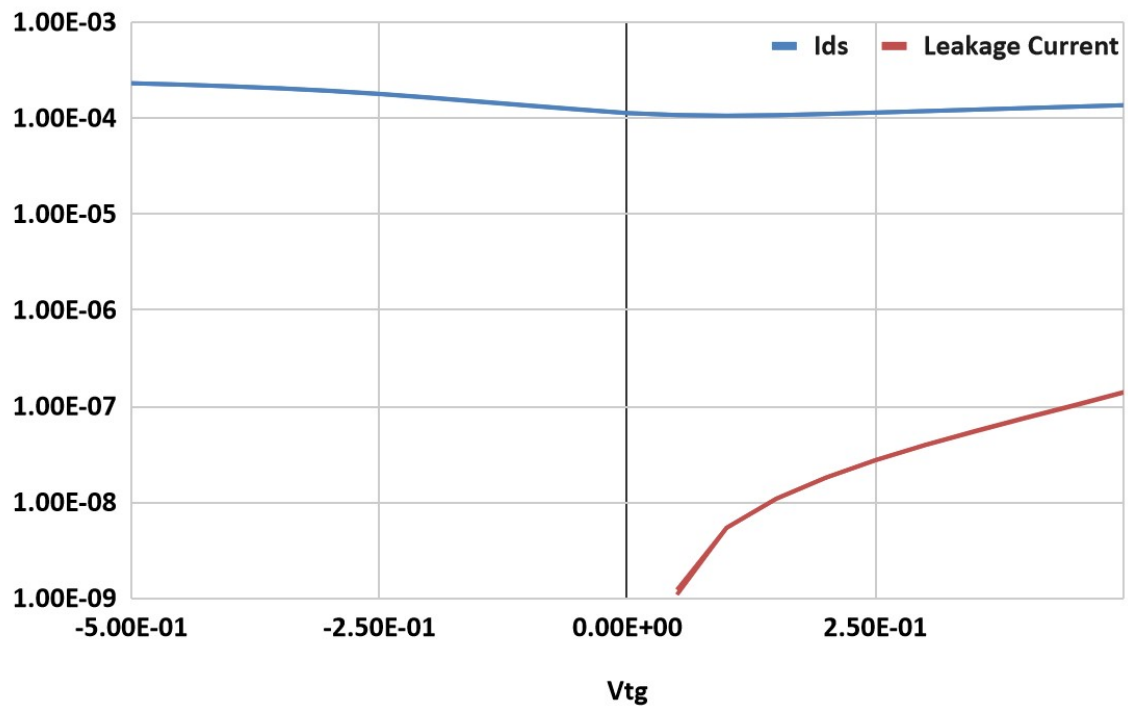

Figure S6:  $I_{ds}$  of the top gated device plotted against the leakage current of the device showing that the leakage current is 3 orders of magnitude lower than the  $I_{ds}$ .
